# Supplementary material
Source: PubMed Central journal article supplement (PMC3548957)
Supplement: NIHMS421780-supplement-2.pdf [file NIHMS421780-supplement-2.pdf]

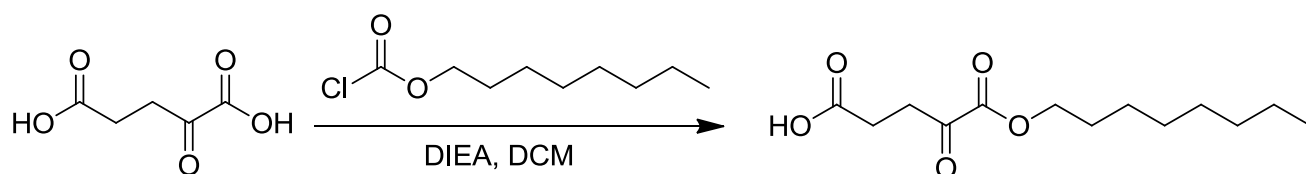

**Supplementary Figure S1.** Synthesis of cell permeable octyl-αKG. Octyl chloroformate (97%, 49.5 g, 250 mmol) was added dropwise to a room temperature solution of αKG (36.4 g, 250 mmol) and TEA (35 mL, 250 mmol) in anhydrous CH<sub>2</sub>Cl<sub>2</sub> (2000 mL). The mixture was stirred 48 h at room temperature after which time the starting material had been consumed (TLC, 10% EtOAc in hexanes). The mixture was diluted with CH<sub>2</sub>Cl<sub>2</sub> (1000 mL), washed with 0.5 N HCl (2 x 1000 mL) and dried (MgSO<sub>4</sub>). The drying agent was removed by filtration. Silica gel (~50 g) was added and the filtrate was concentrated to dryness under reduced pressure. Flash column chromatography (RediSepR<sub>f</sub> SiO<sub>2</sub> (330 g), 100% hexanes→50% EtOAc in hexanes) gave the product as a clear pale yellow oil (13.6 g, 21%), which was consistent with literature characteristics by NMR and LC-MS.
