# Supplementary material
Source: PubMed Central journal article supplement (PMC3548957)
Supplement: NIHMS421780-supplement-3.pdf [file NIHMS421780-supplement-3.pdf]

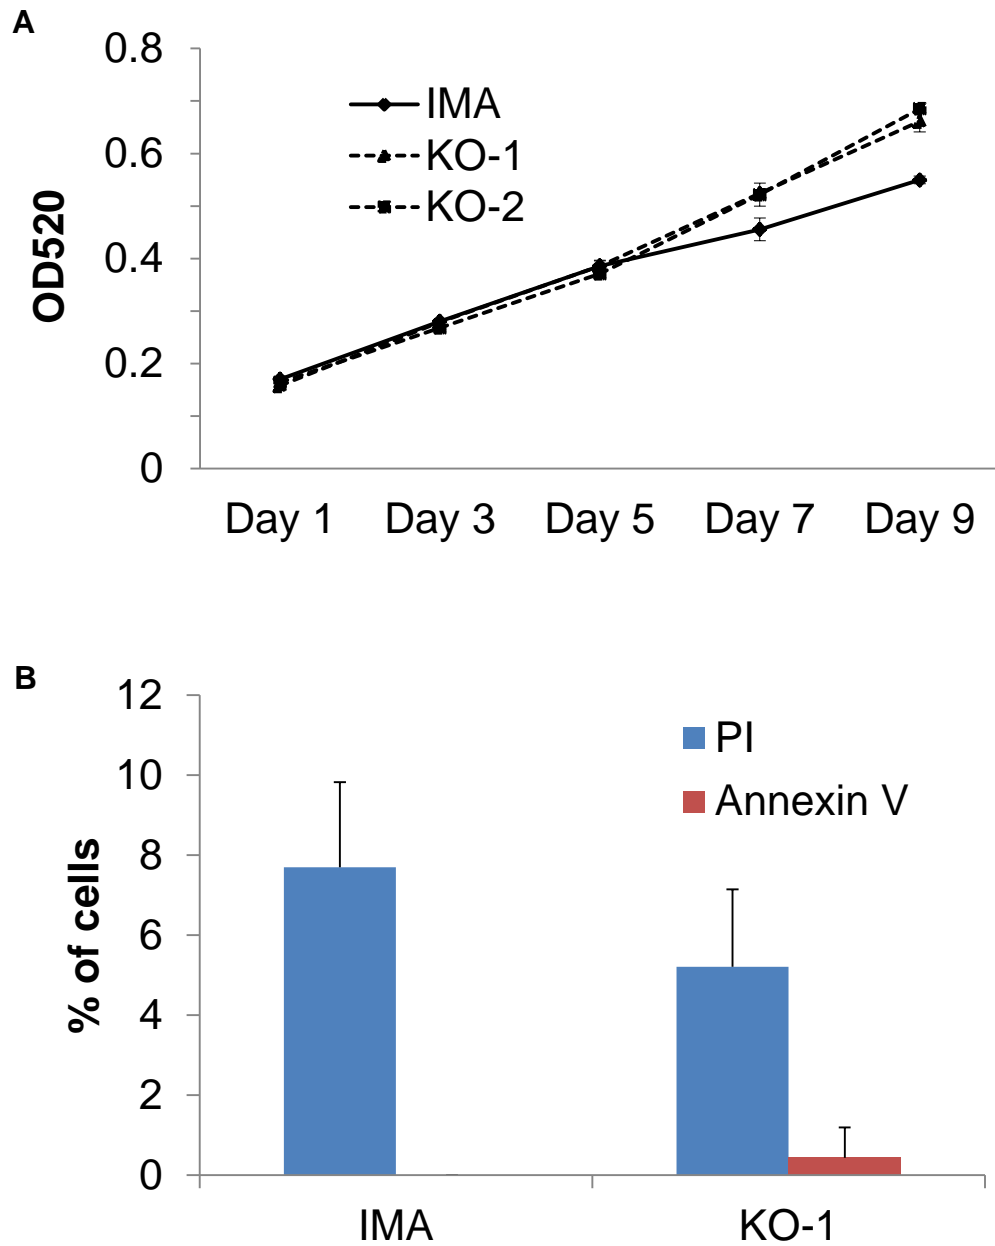

**Supplementary Figure S2.** Growth of parental IMA cells (*IDH1<sup>R132H/WT</sup>*) and sublines with wild type IDH1 knocked out (*IDH1<sup>R132H/-</sup>*). *A*, Growth of cells as assessed by the MTT assay. Cells were seeded into 12-well plates (60,000/well). MTT assays were used to measure cell proliferation at indicated time points. *B*, Propidium iodide staining (PI) and annexin V staining were carried out to determine the percentage of dead cells and cells undergoing apoptosis, respectively. For both panels, mean +/- s.d. are shown for assays were performed in triplicate. IMA was not significantly different from KO-1 or from KO-2 for any comparisons (Student's t test).
