# Supplementary material
Source: PubMed Central journal article supplement (PMC3548957)
Supplement: NIHMS421780-supplement-4.pdf [file NIHMS421780-supplement-4.pdf]

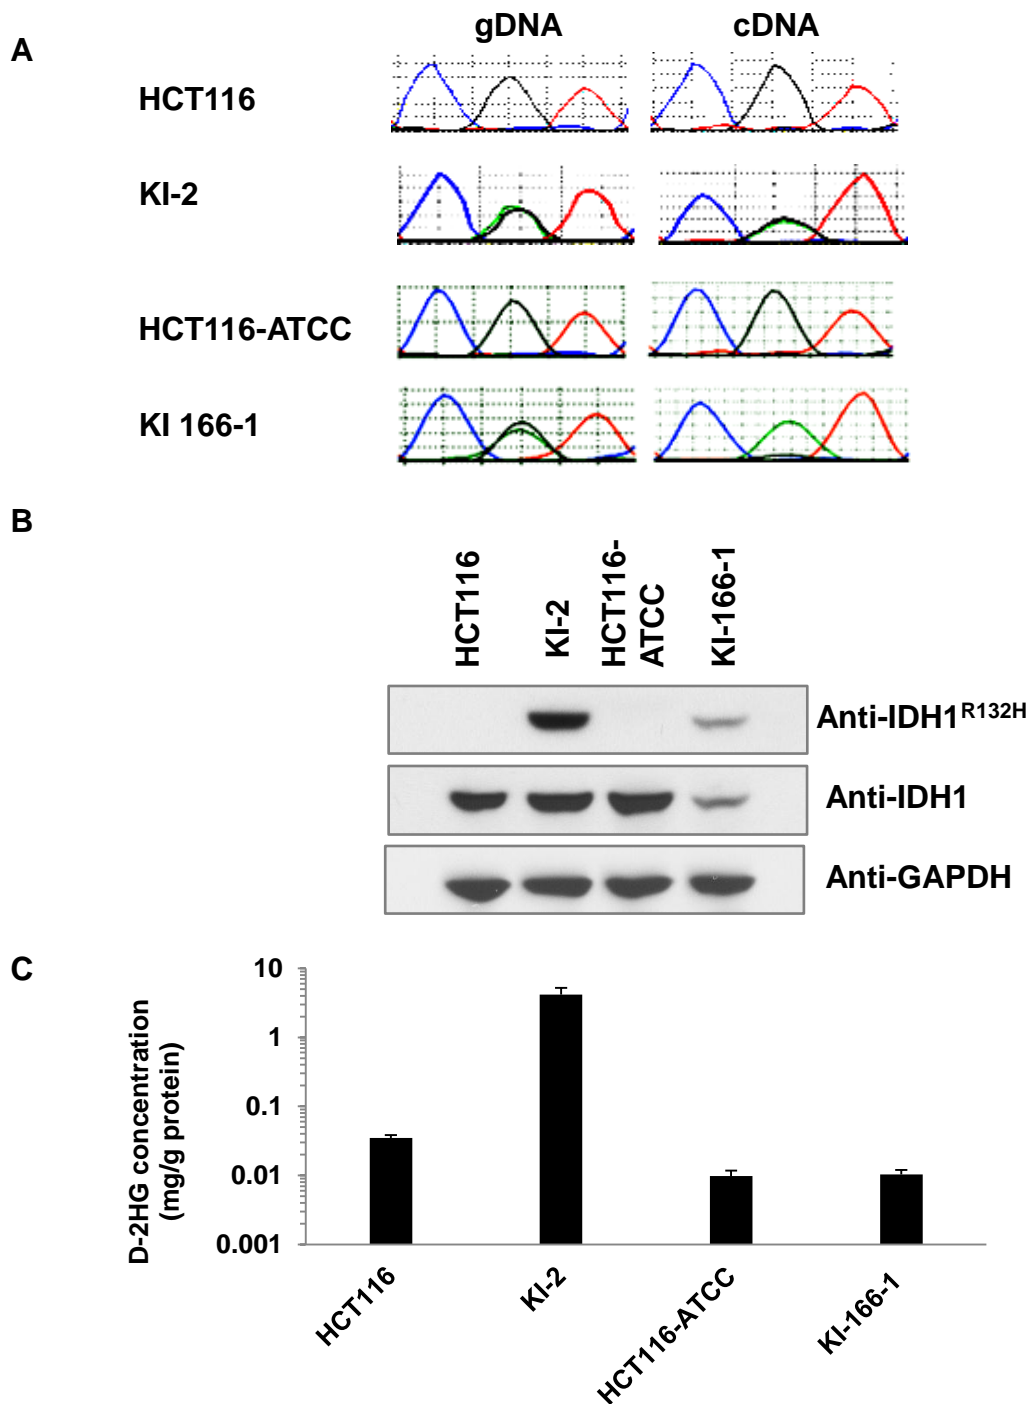

**Supplementary Figure S3.** Mutant IDH1 in the absence of wild type IDH1 is not sufficient to efficiently produce D-2HG in HCT116 cells. Gene-targeting technology was used to introduce the *IDH1*<sup>R132H</sup> allele to HCT116 to generate *IDH1*<sup>R132H/WT</sup> clones. In one of the knockin clones, wild type IDH1 and mutant IDH1 were expressed at approximately equal levels based on cDNA sequencing, and these clones were associated with 100-fold increased cellular D-2HG levels. Another clone, which was derivative from HCT116-ATCC and had a confirmed *IDH1*<sup>R132H</sup> knockin, was noted during our initial characterization to only express the *IDH1*<sup>R132H</sup> allele, without expression of the wild type IDH1 allele. This allelic variation occurred for unexplained reasons. *A*, Representative sequencing chromatograms for IDH1 codon 132 in gDNA and cDNA of parental HCT116 and *IDH1*<sup>R132H</sup> knockin cell lines. *B*, Western blot verification of *IDH1*<sup>R132H</sup> expression in *IDH1*<sup>R132H</sup> knockin cell lines. *C*, D-2HG levels in lysates of HCT116 parental and *IDH1*<sup>R132H</sup> knockin cell lines.
